# Supplementary material
Source: publisher site journal article supplement (https://www.spandidos-publications.com/2396/downloadSupplementary)

Figure S1. Results of PCR identification of conditioned transgenic mice. Lane M, DNA marker; lanes 1-3, PDK1<sup>fllox/fllox</sup> mice (509 bp); lanes 4 and 7, PDK1<sup>+/+</sup> mice (392 bp); lanes 5 and 6, PDK1<sup>fllox/+</sup> mice (509/392 bp). PDK1, 3-phosphoinositide-dependent protein kinase-1.

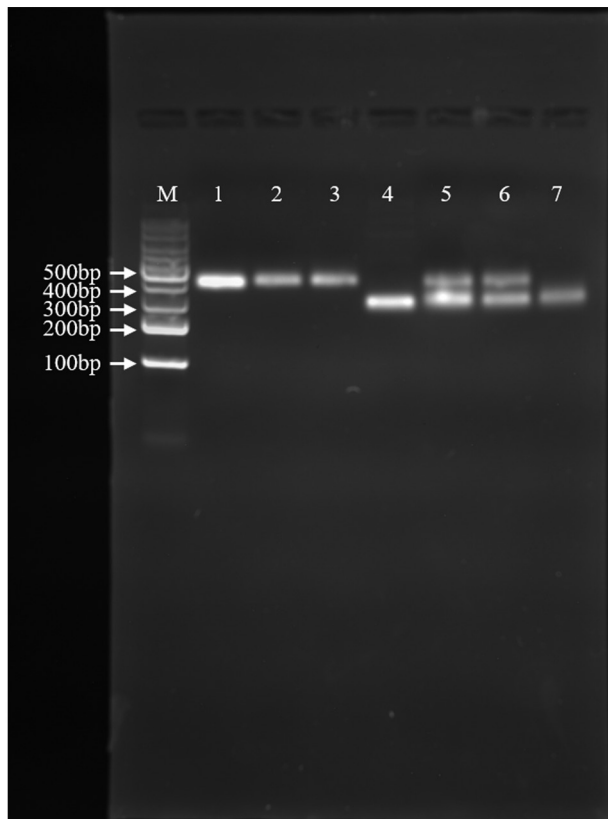

Supplement: Supplementary file 1 [file downloadSupplementary]
